# Supplementary material for: Barcode Sequencing Screen Identifies SUB1 as a Regulator of Yeast Pheromone Inducible Genes
Source: PubMed Central journal article supplement (PMC4825658; doi:10.1534/g3.115.026757), 2016-02-01
Supplement: supp_g3.115.026757_FigureS1.pdf [file supp_g3.115.026757_FigureS1.pdf]

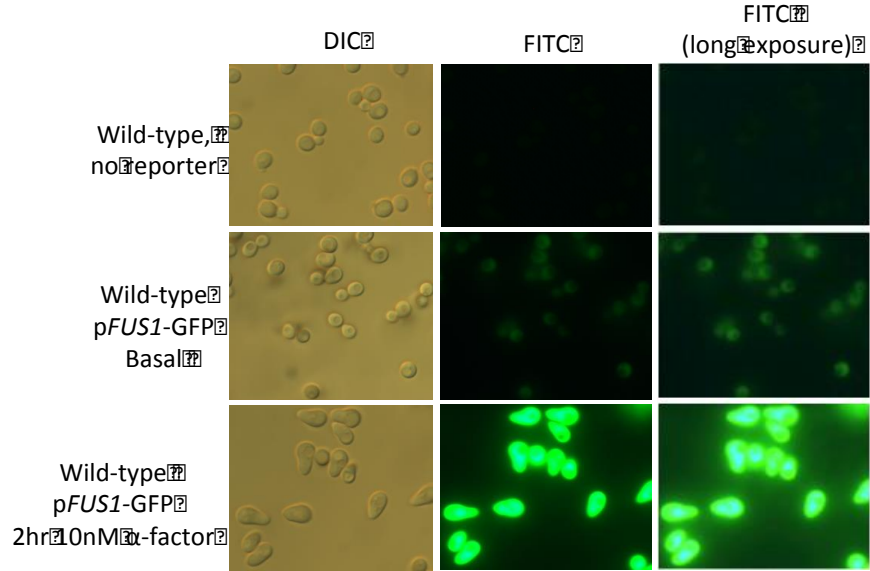

**Figure S1** The wild-type strain transformed with the reporter construct (yAS38 control strain) forms shmoos and has higher GFP fluorescence under  $\alpha$ -factor treatment.
