# Supplementary material for: Barcode Sequencing Screen Identifies SUB1 as a Regulator of Yeast Pheromone Inducible Genes
Source: PubMed Central journal article supplement (PMC4825658; doi:10.1534/g3.115.026757), 2016-02-01
Supplement: supp_g3.115.026757_FigureS2.pdf [file supp_g3.115.026757_FigureS2.pdf]

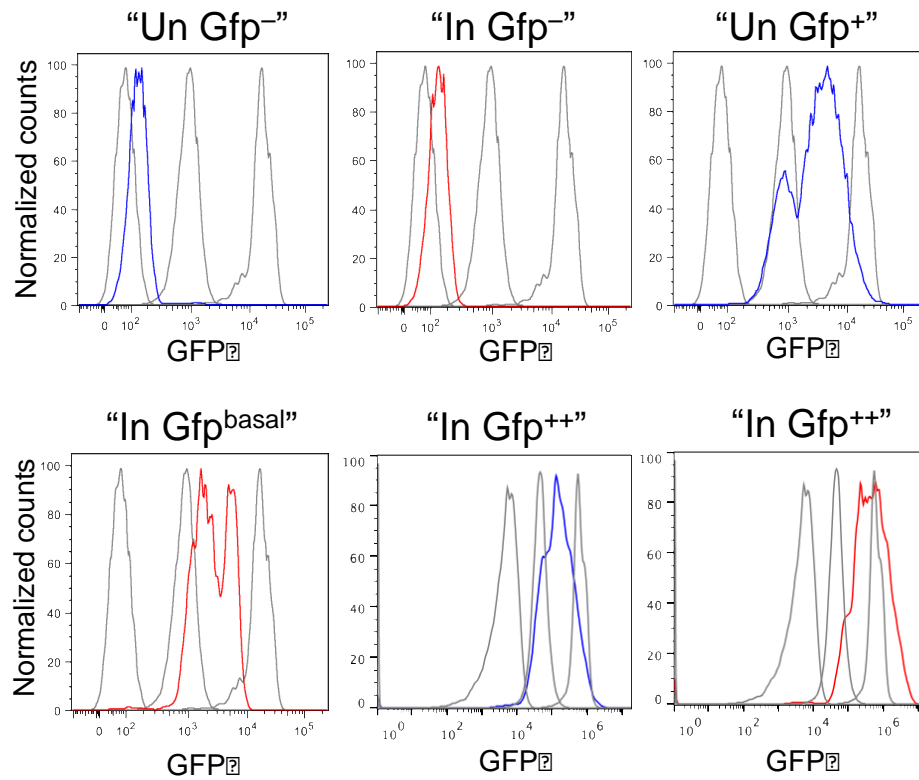

**Figure S2** FACS analysis of populations after sorting.

*Top Panel:* FACS analysis of “Un Gfp<sup>-</sup>” population regrown in uninduced conditions after sorting; FACS analysis of “In Gfp<sup>-</sup>” population regrown in induced conditions after sorting; and FACS analysis of “Un Gfp<sup>+</sup>” population regrown in uninduced conditions after sorting.

*Bottom Panel:* FACS analysis of “In Gfp<sup>basal</sup>” population regrown in induced conditions after sorting; FACS analysis of “In Gfp<sup>++</sup>” population regrown in uninduced conditions; and FACS analysis of “In Gfp<sup>++</sup>” population regrown in induced conditions.
