# Supplementary material for: Barcode Sequencing Screen Identifies SUB1 as a Regulator of Yeast Pheromone Inducible Genes
Source: PubMed Central journal article supplement (PMC4825658; doi:10.1534/g3.115.026757), 2016-02-01
Supplement: supp_g3.115.026757_FigureS3.pdf [file supp_g3.115.026757_FigureS3.pdf]

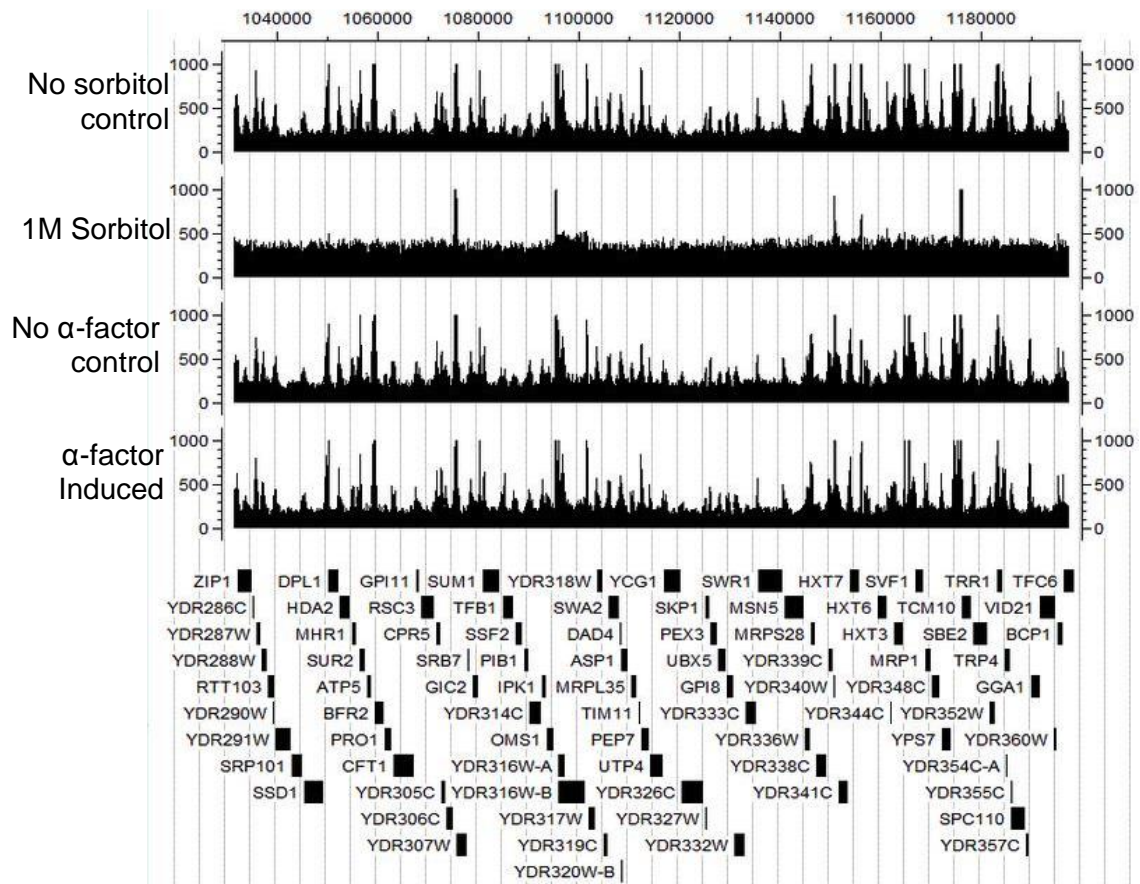

**Figure S3** Screenshot of Sub1-3HA ChIP-Seq under high osmolarity conditions. ChIP-Seq of Sub1 shows that, overall, Sub1 releases binding genome-wide under high sorbitol conditions.
