# Supplementary material for: Barcode Sequencing Screen Identifies SUB1 as a Regulator of Yeast Pheromone Inducible Genes
Source: PubMed Central journal article supplement (PMC4825658; doi:10.1534/g3.115.026757), 2016-02-01
Supplement: supp_g3.115.026757_FigureS5.pdf [file supp_g3.115.026757_FigureS5.pdf]

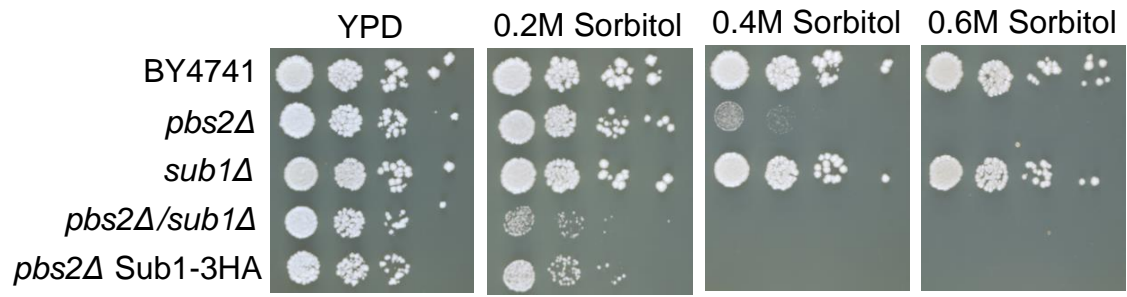

**Figure S5** SUB1-3HA tagged strain retains some Sub1 function.
