# Supplementary material for: Barcode Sequencing Screen Identifies SUB1 as a Regulator of Yeast Pheromone Inducible Genes
Source: PubMed Central journal article supplement (PMC4825658; doi:10.1534/g3.115.026757), 2016-02-01
Supplement: supp_g3.115.026757_FigureS7.pdf [file supp_g3.115.026757_FigureS7.pdf]

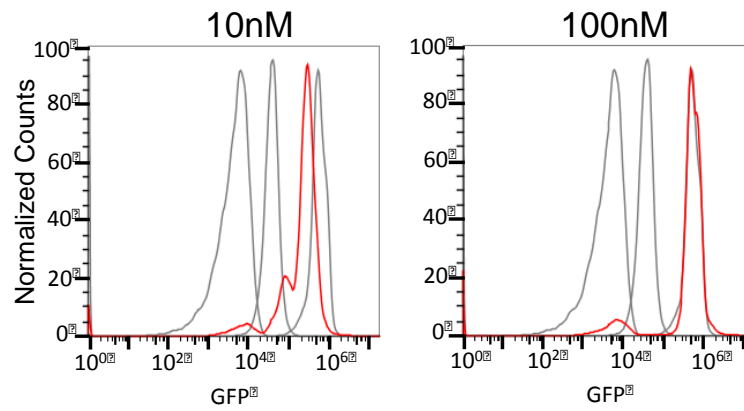

**Figure S7** Fluorescence peak of YKO library shifts with a higher concentration of  $\alpha$ -factor. Adding more  $\alpha$ -factor to the YKO library shifts peak of  $\alpha$ -factor induced to wild-type levels (10nM vs. 100nM).
