# Supplementary material for: Barcode Sequencing Screen Identifies SUB1 as a Regulator of Yeast Pheromone Inducible Genes
Source: PubMed Central journal article supplement (PMC4825658; doi:10.1534/g3.115.026757), 2016-02-01
Supplement: supp_g3.115.026757_FigureS8.pdf [file supp_g3.115.026757_FigureS8.pdf]

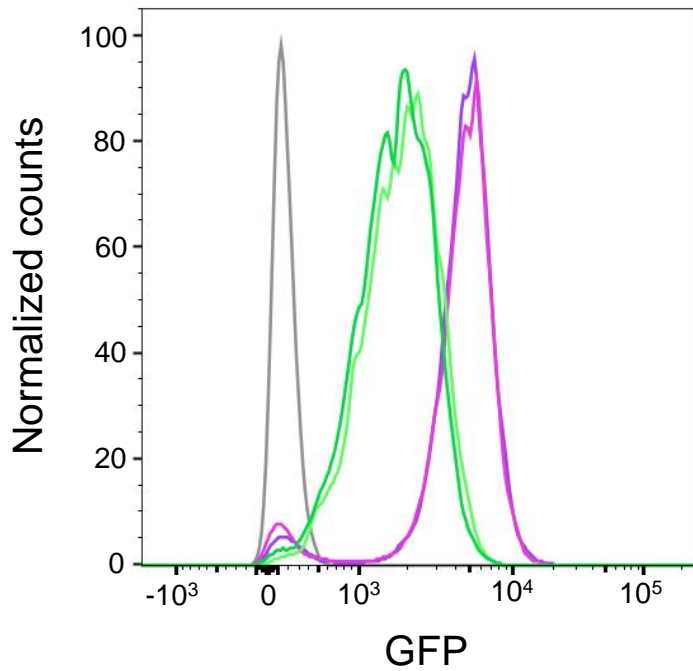

| Strain                          | Mean GFP Fluorescence |
|---------------------------------|-----------------------|
| yAS476 + Sub1 replicate 1       | 1894                  |
| yAS476 + Sub1 replicate 2       | 2061                  |
| yAS476 empty vector replicate 1 | 4827                  |
| yAS476 empty vector replicate 2 | 4950                  |
| BY4741 Negative Control         | 165                   |

**Figure S8** Plasmid rescue of *sub1Δ* mutant. This plasmid rescue experiment shows that wild-type expression of Sub1 from a pRS416 plasmid decreases the p*FUS1*-GFP expression in a *sub1Δ* mutant.
