# Supplementary material for: Barcode Sequencing Screen Identifies SUB1 as a Regulator of Yeast Pheromone Inducible Genes
Source: PubMed Central journal article supplement (PMC4825658; doi:10.1534/g3.115.026757), 2016-02-01
Supplement: supp_g3.115.026757_FigureS9.pdf [file supp_g3.115.026757_FigureS9.pdf]

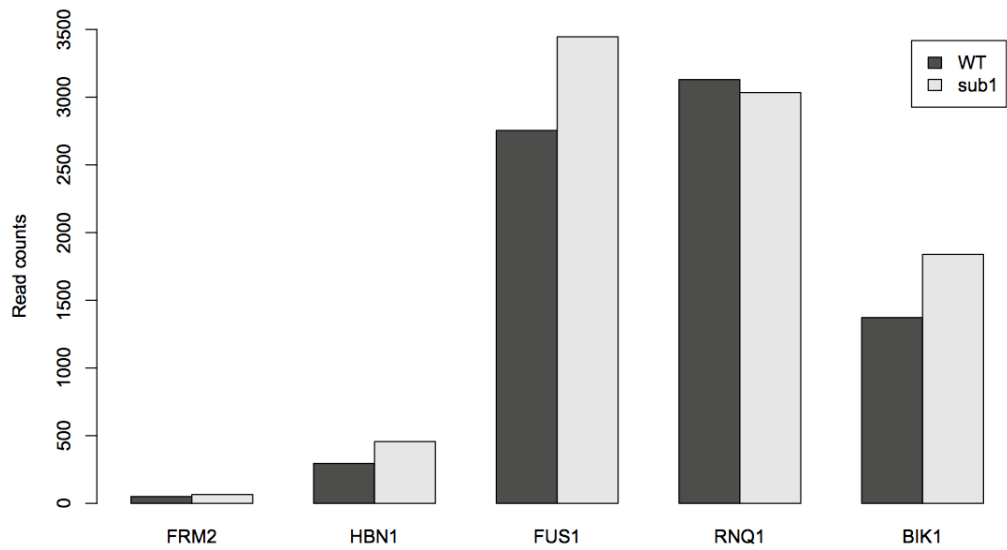

**Figure S9** *FUS1* expression is higher in a *sub1* $\Delta$  mutant relative to wild-type. Additional computational analysis of RNA-Seq read counts shows that *FUS1* expression in a *sub1* $\Delta$  mutant is ~1.2 fold higher than wild-type.
