# Supplementary material for: Barcode Sequencing Screen Identifies SUB1 as a Regulator of Yeast Pheromone Inducible Genes
Source: PubMed Central journal article supplement (PMC4825658; doi:10.1534/g3.115.026757), 2016-02-01
Supplement: supp_g3.115.026757_FileS2.pdf [file supp_g3.115.026757_FileS2.pdf]

**Supplemental Methods:** Primers used in this study. (The specific multiplex tag sequences used are listed in the GEO data submission file).

### **UPTAG Primer Sequences**

(Illumina Adaptor sequence, **unique multiplex tag**, U1):  
AATGATACGGCGACCACCGAGATCTACACTCTTTCCCTACACGACGCTCTTCCGATCT**xxx**  
GATGTCCACGAGGTCTCT

U1 UPTAG primers above were used with a modified U2c\* kanMX sequence:  
CAAGCAGAAGACGGCATACGAGCTCTTCCGATCTtggatgcaaatgattatacatgg  
(Illumina Adaptor sequence, **kanMX sequence**) to amplify the YKO UPTAG barcodes from each sorted population. The size of the amplicons from this PCR reaction is ~350bp.

### **DNTAG Primer Sequences**

(Illumina Adaptor sequence, **unique multiplex tag**, D1)  
AATGATACGGCGACCACCGAGATCTACACTCTTTCCCTACACGACGCTCTTCCGATCT**xxx**  
CGGTGTCGGTCTCGTAG

D1 DNTAG primers above were amplified with a modified D2c\* sequence:  
CAAGCAGAAGACGGCATACGAGCTCTTCCGATCTtaacgccgccatccagtgtcg (Illumina Adaptor sequence, **kanMX sequence**) to amplify the YKO DNTAG barcodes from each sorted population. The size of the amplicon from this PCR reaction is ~180bp.

## References

Giaever G, Nislow C. 2014. The yeast deletion collection: a decade of functional genomics. *Genetics* **197**: 451-465.

Schild D, Ananthaswamy HN, Mortimer RK. 1981. An endomitotic effect of a cell cycle mutation of *Saccharomyces cerevisiae*. *Genetics* **97**: 551-562.

Svoboda A. 1978. Fusion of yeast protoplasts induced by polyethylene glycol. *J Gen Microbiol* **109**: 169-175.
