# Supplementary material for: Barcode Sequencing Screen Identifies SUB1 as a Regulator of Yeast Pheromone Inducible Genes
Source: PubMed Central journal article supplement (PMC4825658; doi:10.1534/g3.115.026757), 2016-02-01
Supplement: supp_g3.115.026757_TableS1.pdf [file supp_g3.115.026757_TableS1.pdf]

**Table S1. Top genes enriched in “Un Gfp-“ population.**

Genes in orange are expected to be enriched in this population; **YDL041W\*** overlaps completely with *SIR2/YDL042C*; N/A = slow growth or lethal phenotype; not tested for p*FUS1*-GFP expression.

| Systematic Name | Common Name     | Log2 Fold Change | padj     | Individually Tested Phenotype   | Newly Made Mutant Phenotype     |
|-----------------|-----------------|------------------|----------|---------------------------------|---------------------------------|
| YPR126C         | YPR126C         | 9.427            | 4.37E-05 | Gfp <sup>-</sup> ; no induction | Wild-type                       |
| <b>YLR442C</b>  | <b>SIR3</b>     | 9.324            | 1.40E-08 |                                 | Gfp <sup>-</sup> ; no induction |
| <b>YDL159W</b>  | <b>STE7</b>     | 9.283            | 2.65E-05 |                                 | Gfp <sup>-</sup> ; no induction |
| <b>YDR227W</b>  | <b>SIR4</b>     | 9.269            | 2.71E-14 |                                 | Gfp <sup>-</sup> ; no induction |
| <b>YIL011W</b>  | TIR3            | 9.223            | 1.74E-06 | Wild-type                       |                                 |
| <b>YDL042C</b>  | <b>SIR2</b>     | 9.177            | 1.74E-06 |                                 | Gfp <sup>-</sup> ; no induction |
| <b>YOR212W</b>  | <b>STE4</b>     | 9.158            | 5.52E-05 |                                 | Gfp <sup>-</sup> ; no induction |
| <b>YDR103W</b>  | <b>STE5</b>     | 9.153            | 4.46E-06 |                                 | Gfp <sup>-</sup> ; no induction |
| <b>YDR443C</b>  | SSN2            | 9.111            | 4.87E-05 | Wild-type                       |                                 |
| <b>YDL041W*</b> | <b>YDL041W*</b> | 9.102            | 2.74E-08 |                                 |                                 |
| <b>YDR462W</b>  | MRPL28          | 9.063            | 0.0009   | Wild-type                       |                                 |
| <b>YDL074C</b>  | BRE1            | 9.041            | 1.71E-05 |                                 | Wild-type                       |
| <b>YHR177W</b>  | YHR177W         | 9.028            | 2.59E-05 | Lower basal; no induction       | Wild-type                       |
| <b>YOR359W</b>  | VTS1            | 9.014            | 2.65E-05 | Wild-type                       |                                 |
| <b>YIL042C</b>  | PKP1            | 9.000            | 1.35E-05 | Wild-type                       |                                 |
| <b>YBR085W</b>  | AAC3            | 8.984            | 1.87E-08 | Lower basal; no induction       | Wild-type                       |
| <b>YIL066C</b>  | RNR3            | 8.981            | 0.0002   | Wild-type                       |                                 |
| <b>YIL133C</b>  | RPL16A          | 8.975            | 0.0020   | Wild-type                       |                                 |
| <b>YIL009W</b>  | FAA3            | 8.973            | 0.0011   | Wild-type                       |                                 |
| <b>YIL012W</b>  | YIL012W         | 8.966            | 0.0001   | Gfp <sup>-</sup> ; no induction | Wild-type                       |
| <b>YOR369C</b>  | RPS12           | 8.962            | 5.25E-09 | Lower basal; no induction       | N/A                             |
| <b>YIL044C</b>  | AGE2            | 8.961            | 1.99E-05 |                                 |                                 |
| <b>YLL026W</b>  | HSP104          | 8.952            | 0.0004   | Wild-type                       |                                 |
| <b>YIL093C</b>  | RSM25           | 8.945            | 6.29E-05 | Gfp <sup>-</sup> ; no induction |                                 |
| <b>YIL032C</b>  | YIL032C         | 8.942            | 1.80E-05 | Wild-type                       |                                 |
| <b>YIR013C</b>  | GAT4            | 8.933            | 0.0002   | Wild-type                       |                                 |
| <b>YIL154C</b>  | IMP2            | 8.924            | 0.0001   | Gfp <sup>-</sup> ; no induction | Wild-type                       |
| <b>YDL073W</b>  | YDL073W         | 8.917            | 2.65E-05 | Wild-type                       |                                 |
| <b>YMR088C</b>  | VBA1            | 8.913            | 2.50E-05 |                                 |                                 |
| <b>YNL264C</b>  | PDR17           | 8.819            | 4.06E-06 | Gfp <sup>-</sup> ; no induction | Wild-type                       |
| <b>YIL014W</b>  | MNT3            | 8.816            | 1.22E-05 | Wild-type                       |                                 |
| <b>YIL079C</b>  | AIR1            | 8.815            | 0.0004   | Wild-type                       |                                 |
| <b>YHR178W</b>  | STB5            | 8.811            | 2.79E-05 | Wild-type                       |                                 |

|                |                |       |          |             |                                                           |
|----------------|----------------|-------|----------|-------------|-----------------------------------------------------------|
| <b>YIL025C</b> | YIL025C        | 8.717 | 0.0029   | Wild-type   |                                                           |
| <b>YBR032W</b> | YBR032W        | 8.679 | 0.0002   | Lower basal | Wild-type                                                 |
| <b>YNR075W</b> | COS10          | 8.668 | 0.0037   | Wild-type   |                                                           |
| <b>YIL030C</b> | SSM4/DOA<br>10 | 8.632 | 6.60E-06 | Lower basal | Lower basal                                               |
| <b>YOR320C</b> | GNT1           | 8.537 | 8.09E-05 |             |                                                           |
| <b>YNL288W</b> | CAF40          | 8.354 | 0.0193   |             |                                                           |
| <b>YNR013C</b> | PHO91          | 8.328 | 0.0001   |             |                                                           |
| <b>YKR101W</b> | SIR1           | 8.231 | 0.0047   |             | Mixed population, most<br>Gfp <sup>-</sup> (See Figure 3) |
