# Supplementary material for: Barcode Sequencing Screen Identifies SUB1 as a Regulator of Yeast Pheromone Inducible Genes
Source: PubMed Central journal article supplement (PMC4825658; doi:10.1534/g3.115.026757), 2016-02-01
Supplement: supp_g3.115.026757_TableS2.pdf [file supp_g3.115.026757_TableS2.pdf]

**Table S2. Top genes enriched in the “In Gfp-” population.**

Genes in orange are expected to be enriched in this population; **YDL041W\*** overlaps completely with *SIR2/YDL042C*; N/A = slow growth or lethal phenotype and not tested for *pFUS1*-GFP expression.

| Systematic Name | Common Name     | Log2 Fold Change | padj   | Individually Tested Phenotype   | Newly Made Mutant Phenotype     |
|-----------------|-----------------|------------------|--------|---------------------------------|---------------------------------|
| YIL011W         | TIR3            | 9.885            | 0.0026 | Wild-type                       |                                 |
| <b>YDR227W</b>  | <b>SIR4</b>     | 9.864            | 0.0026 |                                 | Gfp <sup>-</sup> ; no induction |
| YIL030C         | SSM4/DOA10      | 9.817            | 0.0026 | Lower basal                     | Lower basal                     |
| YPR126C         | YPR126C         | 9.761            | 0.0026 | Gfp <sup>-</sup> ; no induction | Wild-type                       |
| YDL073W         | YDL073W         | 9.729            | 0.0026 | Wild-type                       |                                 |
| YIL032C         | YIL032C         | 9.720            | 0.0026 | Wild-type                       |                                 |
| YBR085W         | AAC3            | 9.706            | 0.0026 | Lower basal; no induction       | Wild-type                       |
| YNL264C         | PDR17           | 9.703            | 0.0026 | Gfp <sup>-</sup> ; no induction | Wild-type                       |
| YIL042C         | PKP1            | 9.683            | 0.0026 | Wild-type                       |                                 |
| YIL014W         | MNT3            | 9.682            | 0.0120 | Wild-type                       |                                 |
| <b>YLR442C</b>  | <b>SIR3</b>     | 9.670            | 0.0047 |                                 | Gfp <sup>-</sup> ; no induction |
| <b>YDR103W</b>  | <b>STE5</b>     | 9.639            | 0.0055 |                                 | Gfp <sup>-</sup> ; no induction |
| YDR462W         | MRPL28          | 9.629            | 0.0055 | Wild-type                       |                                 |
| YDR443C         | SSN2            | 9.626            | 0.0026 | Wild-type                       |                                 |
| YIL066C         | RNR3            | 9.606            | 0.0026 | Wild-type                       |                                 |
| YOR359W         | VTS1            | 9.600            | 0.0026 | Wild-type                       |                                 |
| YIL009W         | FAA3            | 9.594            | 0.0026 | Wild-type                       |                                 |
| <b>YDL159W</b>  | <b>STE7</b>     | 9.585            | 0.0049 |                                 | Gfp <sup>-</sup> ; no induction |
| YIL044C         | AGE2            | 9.581            | 0.0026 |                                 |                                 |
| YHR177W         | YHR177W         | 9.578            | 0.0026 | Lower basal; no induction       | Wild-type                       |
| YIL154C         | IMP2            | 9.557            | 0.0028 | Gfp <sup>-</sup> ; no induction | Wild-type                       |
| YIL012W         | YIL012W         | 9.552            | 0.0031 | Gfp <sup>-</sup> ; no induction | Wild-type                       |
| YDL074C         | BRE1            | 9.548            | 0.0026 |                                 | Wild-type                       |
| YIL093C         | RSM25           | 9.546            | 0.0026 | Gfp <sup>-</sup> ; no induction |                                 |
| YHR178W         | STB5            | 9.545            | 0.0065 | Wild-type                       |                                 |
| <b>YDL041W*</b> | <b>YDL041W*</b> | 9.542            | 0.0026 |                                 |                                 |
| <b>YOR212W</b>  | <b>STE4</b>     | 9.536            | 0.0049 |                                 | Gfp <sup>-</sup> ; no induction |
| YIR013C         | GAT4            | 9.531            | 0.0026 | Wild-type                       |                                 |
| YIL079C         | AIR1            | 9.523            | 0.0026 | Wild-type                       |                                 |
| YOR369C         | RPS12           | 9.513            | 0.0026 | Lower basal; no induction       | N/A                             |
| YLL026W         | HSP104          | 9.512            | 0.0026 | Wild-type                       |                                 |
| YIL133C         | RPL16A          | 9.506            | 0.0055 | Wild-type                       |                                 |
| YMR088C         | VBA1            | 9.505            | 0.0026 |                                 |                                 |
| <b>YDL042C</b>  | <b>SIR2</b>     | 9.496            | 0.0045 |                                 | Gfp <sup>-</sup> ; no induction |
| YNR075W         | COS10           | 9.490            | 0.0070 | Wild-type                       |                                 |

---

|                |         |       |        |             |           |
|----------------|---------|-------|--------|-------------|-----------|
| <b>YIL025C</b> | YIL025C | 9.370 | 0.0065 | Wild-type   |           |
| <b>YBR032W</b> | YBR032W | 9.283 | 0.0028 | Lower basal | Wild-type |

---
