# Supplementary material for: Barcode Sequencing Screen Identifies SUB1 as a Regulator of Yeast Pheromone Inducible Genes
Source: PubMed Central journal article supplement (PMC4825658; doi:10.1534/g3.115.026757), 2016-02-01
Supplement: supp_g3.115.026757_TableS3.pdf [file supp_g3.115.026757_TableS3.pdf]

**Table S3. Top genes enriched in “In Gfp<sup>basal</sup>” population.**

Genes in orange are expected to be enriched in this population; YJR087W\* partially overlaps with *STE18*; shaded *kch1* and *whi3* mutants are a source of false positives and are described further in the text.

| Systematic Name | Common Name | Log2 Fold Change | padj     | Individually Tested Phenotype    | Newly Made Mutant Phenotype               |
|-----------------|-------------|------------------|----------|----------------------------------|-------------------------------------------|
| YFL026W         | STE2        | 3.70176          | 1.06E-71 |                                  | No induction                              |
| YCL032W         | STE50       | 3.52653          | 1.61E-90 |                                  | Lower basal; lower induced (See Figure 3) |
| YJR087W*        | YJR087W*    | 3.38461          | 2.78E-35 |                                  | Lower basal; lower induced                |
| YNL197C         | WHI3        | 2.82035          | 6.48E-52 | Very low basal; modest induction | Lower basal; lower induced                |
| YJL157C         | FAR1        | 2.72306          | 5.50E-40 | Wild-type                        |                                           |
| YOR246C         | ENV9        | 2.28854          | 2.38E-31 | Lower basal                      | Lower basal                               |
| YHL007C         | STE20       | 2.22878          | 5.57E-21 |                                  | Lower basal; lower induced (See Figure 3) |
| YIL043C         | CBR1        | 2.05992          | 1.50E-34 | Lower basal                      | Lower basal                               |
| YIL116W         | HIS5        | 1.97992          | 3.66E-31 | Wild-type                        |                                           |
| YJR054W         | KCH1        | 1.97460          | 1.15E-27 | Lower basal; lower induced       | Wild-type                                 |
| YDR410C         | STE14       | 1.95821          | 1.04E-58 |                                  | Lower basal                               |
| YOR144C         | ELG1        | 1.90017          | 6.74E-18 |                                  |                                           |
| YIL055C         | YIL055C     | 1.89938          | 5.08E-50 | Wild-type                        |                                           |
| YIL101C         | XBP1        | 1.84533          | 2.22E-33 | Wild-type                        |                                           |
| YIL123W         | SIM1        | 1.83481          | 2.55E-10 | Wild-type                        |                                           |
| YCL060C         | YCL060C     | 1.82481          | 2.66E-06 |                                  |                                           |
| YDR181C         | SAS4        | 1.69610          | 1.83E-06 |                                  |                                           |
| YMR052W         | FAR3        | 1.67344          | 3.96E-12 | Wild-type                        |                                           |
| YIL160C         | POT1        | 1.64078          | 4.15E-15 | Wild-type                        |                                           |
| YJL142C         | IRC9        | 1.63983          | 5.73E-07 |                                  |                                           |
| YBL039C         | URA7        | 1.63740          | 7.54E-11 |                                  |                                           |
| YDL021W         | GPM2        | 1.61446          | 1.54E-07 | No induction                     | Wild-type                                 |
| YNL127W         | FAR11       | 1.60648          | 9.23E-07 |                                  |                                           |
| YDR102C         | YDR102C     | 1.57243          | 2.46E-25 |                                  |                                           |
| YIL111W         | COX5B       | 1.56441          | 1.51E-17 | Wild-type                        |                                           |
| YHR108W         | GGA2        | 1.55728          | 2.92E-13 |                                  |                                           |
| YMR029C         | FAR8        | 1.55177          | 1.21E-05 | Wild-type                        |                                           |
| YOR083W         | WHI5        | 1.54981          | 3.60E-15 | Wild-type                        |                                           |
| YGL032C         | AGA2        | 1.54217          | 1.21E-08 | Wild-type                        |                                           |
