# Supplementary material for: Barcode Sequencing Screen Identifies SUB1 as a Regulator of Yeast Pheromone Inducible Genes
Source: PubMed Central journal article supplement (PMC4825658; doi:10.1534/g3.115.026757), 2016-02-01
Supplement: supp_g3.115.026757_TableS4.pdf [file supp_g3.115.026757_TableS4.pdf]

**Table S4. Top genes enriched in “Un Gfp+” population.**

Shaded *sub1* mutant was identified in this study as having higher basal *pFUS1*-GFP reporter expression.

| Systematic Name | Common Name | Log2 Fold Change | padj     | Individually Tested Phenotype   | Newly Made Mutant Phenotype |
|-----------------|-------------|------------------|----------|---------------------------------|-----------------------------|
| YNL049C         | SFB2        | 5.652            | 1.38E-08 | Wild-type                       |                             |
| YDR391C         | YDR391C     | 5.497            | 3.24E-07 |                                 |                             |
| YOR378W         | YOR378W     | 5.311            | 1.38E-12 | Wild-type                       |                             |
| YDL197C         | ASF2        | 5.242            | 2.00E-06 |                                 |                             |
| YCL025C         | AGP1        | 5.130            | 2.28E-05 |                                 |                             |
| YOR342C         | YOR342C     | 5.109            | 1.88E-06 | Wild-type                       |                             |
| YBR090C         | YBR090C     | 4.936            | 3.75E-09 | Wild-type                       |                             |
| YNL299W         | TRF5        | 4.853            | 9.27E-06 | No Induction                    | Wild-type                   |
| YOR093C         | YOR093C     | 4.836            | 2.83E-07 | Wild-type                       |                             |
| YIL136W         | OM45        | 4.832            | 1.42E-06 | Wild-type                       |                             |
| YBL063W         | KIP1        | 4.721            | 3.54E-11 | Wild-type                       |                             |
| YJR019C         | TES1        | 4.496            | 1.74E-08 | Lower basal                     | Wild-type                   |
| YLL015W         | BPT1        | 4.331            | 7.07E-06 | Wild-type                       |                             |
| YNL271C         | BNI1        | 3.935            | 6.11E-61 | Higher basal;<br>higher induced |                             |
| YDR192C         | NUP42       | 3.663            | 3.72E-18 |                                 |                             |
| YOR279C         | RFM1        | 3.559            | 3.77E-67 |                                 |                             |
| YLL047W         | YLL047W     | 3.521            | 6.14E-09 | Wild-type                       |                             |
| YPL248C         | GAL4        | 3.497            | 1.86E-07 |                                 |                             |
| YLR064W         | PER33       | 3.460            | 3.76E-09 |                                 |                             |
| YPR031W         | NTO1        | 3.458            | 9.32E-06 |                                 |                             |
| YLR093C         | NYV1        | 3.417            | 1.22E-05 |                                 |                             |
| YOL068C         | HST1        | 3.323            | 1.75E-06 |                                 |                             |
| YGL254W         | FZF1        | 3.321            | 4.49E-07 | Wild-type                       |                             |
| YER053C         | PIC2        | 3.238            | 1.62E-10 |                                 |                             |
| YPL246C         | RBD2        | 3.122            | 5.07E-08 |                                 |                             |
| YMR039C         | SUB1        | 3.122            | 0.0033   | Higher basal                    | Higher basal                |
