# Supplementary material for: Barcode Sequencing Screen Identifies SUB1 as a Regulator of Yeast Pheromone Inducible Genes
Source: PubMed Central journal article supplement (PMC4825658; doi:10.1534/g3.115.026757), 2016-02-01
Supplement: supp_g3.115.026757_TableS5.pdf [file supp_g3.115.026757_TableS5.pdf]

**Table S5. Top genes enriched in “In Gfp<sup>++</sup>” population.**

Shaded *sub1* mutant was identified in this study as having higher basal *pFUS1*-GFP reporter expression (data from a single experiment).

| Systematic Name | Common Name | Log2 Fold Change | padj            | Individually Tested Phenotype   | Newly Made Mutant Phenotype |
|-----------------|-------------|------------------|-----------------|---------------------------------|-----------------------------|
| YLL047W         | YLL047W     | 1.807            | 2.36E-44        | Wild-type                       |                             |
| YJR019C         | TES1        | 1.743            | 1.09E-26        | Lower basal                     | Wild-type                   |
| YOR378W         | YOR378W     | 1.462            | 1.42E-28        | Wild-type                       |                             |
| YGR206W         | MVB12       | 1.399            | 9.04E-12        | Wild-type                       |                             |
| YNL049C         | SFB2        | 1.389            | 8.84E-11        | Wild-type                       |                             |
| YER106W         | MAM1        | 1.333            | 9.98E-07        | Wild-type                       |                             |
| <b>YMR039C</b>  | <b>SUB1</b> | <b>1.284</b>     | <b>6.42E-05</b> | <b>Higher basal</b>             | <b>Higher basal</b>         |
| YBL063W         | KIP1        | 1.268            | 2.25E-21        | Wild-type                       |                             |
| YDR391C         | YDR391C     | 1.225            | 2.70E-12        |                                 |                             |
| YFL012W         | YFL012W     | 1.205            | 3.79E-06        | Wild-type                       |                             |
| YAL007C         | ERP2        | 1.201            | 2.86E-09        | Wild-type                       |                             |
| YBR016W         | YBR016W     | 1.200            | 7.45E-06        |                                 |                             |
| YMR026C         | PEX12       | 1.182            | 0.0333          | Wild-type                       |                             |
| YML081W         | TDA9        | 1.179            | 2.27E-05        |                                 |                             |
| YMR011W         | HXT2        | 1.178            | 0.0005          | Wild-type                       |                             |
| YAR047C         | YAR047C     | 1.174            | 1.18E-09        | Wild-type                       |                             |
| YLR018C         | POM34       | 1.170            | 0.0069          | Wild-type                       |                             |
| YML037C         | YML037C     | 1.168            | 2.49E-08        | Wild-type                       |                             |
| YIR028W         | DAL4        | 1.161            | 0.0008          |                                 |                             |
| YAL055W         | PEX22       | 1.159            | 1.21E-05        | Wild-type                       |                             |
| YML058C-A       | YML058C-A   | 1.156            | 1.19E-10        | Wild-type                       |                             |
| YNL146W         | YNL146W     | 1.152            | 4.24E-05        | Gfp <sup>-</sup> ; no induction | Wild-type                   |
| YKL197C         | PEX1        | 1.144            | 1.73E-05        |                                 |                             |
| YNL305C         | BXI1        | 1.142            | 1.42E-05        | Wild-type                       |                             |
