# Supplementary material for: Barcode Sequencing Screen Identifies SUB1 as a Regulator of Yeast Pheromone Inducible Genes
Source: PubMed Central journal article supplement (PMC4825658; doi:10.1534/g3.115.026757), 2016-02-01
Supplement: supp_g3.115.026757_TableS6.pdf [file supp_g3.115.026757_TableS6.pdf]

**Table S6a. GFP fluorescence values of mating mutants in Figure 3.**  
 These mutants were made by disrupting the indicated gene with *URA3*.

|                                   | Replicate<br>1 | Replicate<br>2 | Replicate<br>3 | Mean           | pvalue    | Parent<br>strain | Genotype                                                              |
|-----------------------------------|----------------|----------------|----------------|----------------|-----------|------------------|-----------------------------------------------------------------------|
| Negative<br>Control<br>BY4741, Un | 3974           | 3955           | 3822           | 3917           |           |                  | <i>leu2Δ0 met15Δ0<br/>ura3Δ0 his3Δ1</i>                               |
| Negative<br>Control<br>BY4741, In | 3688           | 3603           | 4069           | 3786.6<br>67   |           |                  | <i>leu2Δ0 met15Δ0<br/>ura3Δ0 his3Δ1</i>                               |
| Positive<br>Control<br>yAS38, Un  | 56109          | 51572          | 55000          | 54227          |           |                  | <i>leu2Δ0 met15Δ0<br/>ura3Δ0 his3Δ1<br/>bar1::pFus1-GFP-<br/>LEU2</i> |
| Positive<br>Control<br>yAS38, In  | 5.29E+05       | 6.89E+05       | 5.95E+05       | 6.04E+<br>05   |           |                  | <i>leu2Δ0 met15Δ0<br/>ura3Δ0 his3Δ1<br/>bar1::pFus1-GFP-<br/>LEU2</i> |
| dig1, Un                          | 63300          | 64245          | 61138          | 62894.<br>333  | 0.00623   | yAS38            | <i>dig1Δ::URA3<br/>leu2Δ0 met15Δ0<br/>ura3Δ0 his3Δ1</i>               |
| dig1, In                          | 6.46E+05       | 6.39E+05       | 6.56E+05       | 64700<br>0     | 0.412     | yAS38            | <i>dig1Δ::URA3<br/>leu2Δ0 met15Δ0<br/>ura3Δ0 his3Δ1</i>               |
| dig2, Un                          | 41035          | 39913          | 43066          | 41338          | 0.00144   | yAS38            | <i>dig2Δ::URA3<br/>leu2Δ0 met15Δ0<br/>ura3Δ0 his3Δ1</i>               |
| dig2, In                          | 7.19E+05       | 7.09E+05       | 7.07E+05       | 71166<br>6.667 | 0.0825    | yAS38            | <i>dig2Δ::URA3<br/>leu2Δ0 met15Δ0<br/>ura3Δ0 his3Δ1</i>               |
| fus3, Un                          | 88301          | 88423          | 90833          | 89185.<br>667  | 2.57E-05  | yAS38            | <i>fus3Δk::URA3<br/>leu2Δ0 met15Δ0<br/>ura3Δ0 his3Δ1</i>              |
| fus3, In                          | 4.44E+05       | 4.72E+05       | 4.20E+05       | 44533<br>3.333 | 0.0311    | yAS38            | <i>fus3Δk::URA3<br/>leu2Δ0 met15Δ0<br/>ura3Δ0 his3Δ1</i>              |
| sir1, Un                          | 16165          | 17262          | 20535          | 17987.<br>333  | 4.40E-05  | yAS38            | <i>sir1Δ::URA3<br/>leu2Δ0 met15Δ0<br/>ura3Δ0 his3Δ1</i>               |
| sir1, In                          | 26394          | 38328          | 34506          | 33076          | 0.000253  | yAS38            | <i>sir1Δ::URA3<br/>leu2Δ0 met15Δ0<br/>ura3Δ0 his3Δ1</i>               |
| sir2, Un                          | 5420           | 5612           | 5315           | 5449           | 3.670E-06 | yAS38            | <i>sir2Δ::URA3</i>                                                    |

|                  |          |          |          |                |          |       |                                                          |
|------------------|----------|----------|----------|----------------|----------|-------|----------------------------------------------------------|
|                  |          |          |          |                |          |       | <i>leu2Δ0 met15Δ0<br/>ura3Δ0 his3Δ1</i>                  |
| <b>sir2, In</b>  | 5377     | 5465     | 5354     | 5398.6<br>67   | 0.000208 | yAS38 | <i>sir2Δ::URA3<br/>leu2Δ0 met15Δ0<br/>ura3Δ0 his3Δ1</i>  |
| <b>ste2, Un</b>  | 56435    | 56641    | 55791    | 56289          | 0.212    | yAS38 | <i>ste2Δ::URA3<br/>leu2Δ0 met15Δ0<br/>ura3Δ0 his3Δ1</i>  |
| <b>ste2, In</b>  | 59623    | 61286    | 60690    | 60533          | 0.000304 | yAS38 | <i>ste2Δ::URA3<br/>leu2Δ0 met15Δ0<br/>ura3Δ0 his3Δ1</i>  |
| <b>ste3, Un</b>  | 47584    | 49095    | 46215    | 47631.<br>333  | 0.0146   | yAS38 | <i>ste3Δ::URA3<br/>leu2Δ0 met15Δ0<br/>ura3Δ0 his3Δ1</i>  |
| <b>ste3, In</b>  | 6.97E+05 | 7.74E+05 | 7.96E+05 | 75566<br>6.667 | 0.0520   | yAS38 | <i>ste3Δ::URA3<br/>leu2Δ0 met15Δ0<br/>ura3Δ0 his3Δ1</i>  |
| <b>ste4, Un</b>  | 61410    | 62183    | 58905    | 60832.<br>667  | 0.0173   | yAS38 | <i>ste4Δ::URA3<br/>leu2Δ0 met15Δ0<br/>ura3Δ0 his3Δ1</i>  |
| <b>ste4, In</b>  | 6.39E+05 | 6.07E+05 | 6.26E+05 | 62400<br>0     | 0.699    | yAS38 | <i>ste4Δ::URA3<br/>leu2Δ0 met15Δ0<br/>ura3Δ0 his3Δ1</i>  |
| <b>ste5, Un</b>  | 5968     | 6136     | 6216     | 6106.6<br>67   | 3.89E-06 | yAS38 | <i>ste5Δ::URA3<br/>leu2Δ0 met15Δ0<br/>ura3Δ0 his3Δ1</i>  |
| <b>ste5, In</b>  | 5740     | 5565     | 5633     | 5646           | 0.000208 | yAS38 | <i>ste5Δ::URA3<br/>leu2Δ0 met15Δ0<br/>ura3Δ0 his3Δ1</i>  |
| <b>ste6, Un</b>  | 50461    | 50407    | 50085    | 50317.<br>667  | 0.0463   | yAS38 | <i>ste6Δ::URA3<br/>leu2Δ0 met15Δ0<br/>ura3Δ0 his3Δ1</i>  |
| <b>ste6, In</b>  | 7.42E+05 | 7.36E+05 | 7.54E+05 | 74400<br>0     | 0.0404   | yAS38 | <i>ste6Δ::URA3<br/>leu2Δ0 met15Δ0<br/>ura3Δ0 his3Δ1</i>  |
| <b>ste13, Un</b> | 43687    | 39854    | 38229    | 40590          | 0.00299  | yAS38 | <i>ste13Δ::URA3<br/>leu2Δ0 met15Δ0<br/>ura3Δ0 his3Δ1</i> |
| <b>ste13, In</b> | 7.34E+05 | 7.11E+05 | 7.27E+05 | 72400<br>0     | 0.0633   | yAS38 | <i>ste13Δ::URA3<br/>leu2Δ0 met15Δ0<br/>ura3Δ0 his3Δ1</i> |
| <b>ste14, Un</b> | 27590    | 29916    | 29729    | 29078.<br>333  | 8.58E-05 | yAS38 | <i>ste14Δ::URA3<br/>leu2Δ0 met15Δ0<br/>ura3Δ0 his3Δ1</i> |
| <b>ste14, In</b> | 6.69E+05 | 6.67E+05 | 6.56E+05 | 66400          | 0.270    | yAS38 | <i>ste14Δ::URA3</i>                                      |

|                  |          |          |          | 0              |          |       |  | <i>leu2Δ0 met15Δ0<br/>ura3Δ0 his3Δ1</i>                  |
|------------------|----------|----------|----------|----------------|----------|-------|--|----------------------------------------------------------|
| <b>ste20, Un</b> | 11725    | 13814    | 13936    | 13158.<br>333  | 1.18E-05 | yAS38 |  | <i>ste20Δ::URA3<br/>leu2Δ0 met15Δ0<br/>ura3Δ0 his3Δ1</i> |
| <b>ste20, In</b> | 28175    | 35014    | 34960    | 32716.<br>333  | 0.000251 | yAS38 |  | <i>ste20Δ::URA3<br/>leu2Δ0 met15Δ0<br/>ura3Δ0 his3Δ1</i> |
| <b>ste23, Un</b> | 51048    | 46019    | 46675    | 47914          | 0.0390   | yAS38 |  | <i>ste23Δ::URA3<br/>leu2Δ0 met15Δ0<br/>ura3Δ0 his3Δ1</i> |
| <b>ste23, In</b> | 7.47E+05 | 7.38E+05 | 7.30E+05 | 73833<br>3.333 | 0.0454   | yAS38 |  | <i>ste23Δ::URA3<br/>leu2Δ0 met15Δ0<br/>ura3Δ0 his3Δ1</i> |
| <b>ste24, Un</b> | 34709    | 33392    | 32364    | 33488.<br>333  | 0.000169 | yAS38 |  | <i>ste24Δ::URA3<br/>leu2Δ0 met15Δ0<br/>ura3Δ0 his3Δ1</i> |
| <b>ste24, In</b> | 7.00E+05 | 6.97E+05 | 7.04E+05 | 70033<br>3.333 | 0.108    | yAS38 |  | <i>ste24Δ::URA3<br/>leu2Δ0 met15Δ0<br/>ura3Δ0 his3Δ1</i> |

**Table S6b. GFP fluorescence values of mating mutants in Figure 3, continued.**

|                                    | $\Delta$<br><i>marker</i> | Replicate<br>1 | Replicate<br>2 | Replicate<br>3 | Mean           | <i>pvalue</i> | Parent<br>strain | Genotype                                                                     |
|------------------------------------|---------------------------|----------------|----------------|----------------|----------------|---------------|------------------|------------------------------------------------------------------------------|
| <b>Negative Control BY4741, Un</b> | <i>kanMX</i>              | 3952           | 4049           | 3976           | 3992.333       |               | yAS38            | <i>leu2Δ0 met15Δ0 ura3Δ0 his3Δ1</i>                                          |
| <b>Negative Control BY4741, In</b> | <i>kanMX</i>              | 3984           | 3892           | 3868           | 3914.667       |               | yAS38            | <i>leu2Δ0 met15Δ0 ura3Δ0 his3Δ1</i>                                          |
| <b>Positive Control yAS38, Un</b>  | <i>kanMX</i>              | 57279          | 58776          | 55558          | 57204.33<br>3  |               | yAS38            | <i>leu2Δ0 met15Δ0 ura3Δ0 his3Δ1 bar1::pFus1-GFP-LEU2</i>                     |
| <b>Positive Control yAS38, In</b>  | <i>kanMX</i>              | 4.81E+05       | 4.90E+05       | 4.85E+05       | 485333.3<br>33 |               | yAS38            | <i>leu2Δ0 met15Δ0 ura3Δ0 his3Δ1 bar1::pFus1-GFP-LEU2</i>                     |
| <b>kss1, Un</b>                    | <i>kanMX</i>              | 83433          | 84598          | 82443          | 83491.33<br>3  | 1.95E-05      | yAS38            | <i>kss1Δ::kanMX leu2Δ0 met15Δ0 ura3Δ0 his3Δ1</i>                             |
| <b>kss1, In</b>                    | <i>kanMX</i>              | 5.80E+05       | 5.92E+05       | 5.20E+05       | 564000         | 0.0247        | yAS38            | <i>kss1Δ::kanMX leu2Δ0 met15Δ0 ura3Δ0 his3Δ1</i>                             |
| <b>ste4, Un</b>                    | <i>kanMX</i>              | 5699           | 5246           | 5577           | 5507.333       | 6.53E-07      | yAS38            | <i>ste4Δ::kanMX leu2Δ0 met15Δ0 ura3Δ0 his3Δ1</i>                             |
| <b>ste4, In</b>                    | <i>kanMX</i>              | 5510           | 5154           | 5483           | 5382.333       | 5.21E-09      | yAS38            | <i>ste4Δ::kanMX leu2Δ0 met15Δ0 ura3Δ0 his3Δ1</i>                             |
| <b>ste7, Un</b>                    | <i>kanMX</i>              | 5135           | 5168           | 5168           | 5157           | 6.10E-07      | yAS38            | <i>ste7Δ::kanMX leu2Δ0 met15Δ0 ura3Δ0 his3Δ1</i>                             |
| <b>ste7, In</b>                    | <i>kanMX</i>              | 5051           | 4936           | 5029           | 5005.333       | 5.18E-09      | yAS38            | <i>ste7Δ::kanMX leu2Δ0 met15Δ0 ura3Δ0 his3Δ1</i>                             |
| <b>ste8/sir3, Un</b>               | <i>URA3</i>               | 5151           | 5380           | 7667           | 6066           | 1.991E-06     | yAS38            | <i>ste8Δ::kanMX leu2Δ0 lys2Δ0 ura3Δ0 his3Δ1 met15Δ0 bar1::pFUS1-GFP-LEU2</i> |

|                      |              |      |      |      |          |           |        |                                                                                                                                                                                                                                                                          |
|----------------------|--------------|------|------|------|----------|-----------|--------|--------------------------------------------------------------------------------------------------------------------------------------------------------------------------------------------------------------------------------------------------------------------------|
| <b>ste8/sir3, In</b> | <i>URA3</i>  | 4504 | 4656 | 6226 | 5128.667 | 5.66E-09  | yAS38  | <i>steΔ8::kanMX</i><br><i>leu2Δ0 lys2Δ0</i><br><i>ura3Δ0 his3Δ1</i><br><i>met15Δ0</i><br><i>bar1::pFUS1-GFP-LEU2</i>                                                                                                                                                     |
| <b>ste9/sir4, Un</b> | <i>kanMX</i> | 4655 | 4481 | 4359 | 4498.333 | 5.90E-07  | yAS38  | <i>ste9/sir4Δ::kanMX</i><br><i>leu2Δ0 met15Δ0</i><br><i>ura3Δ0 his3Δ1</i>                                                                                                                                                                                                |
| <b>ste9/sir4, In</b> | <i>kanMX</i> | 4451 | 4284 | 3988 | 4241     | 5.17E-09  | yAS38  | <i>ste9/sir4Δ::kanMX</i><br><i>leu2Δ0 met15Δ0</i><br><i>ura3Δ0 his3Δ1</i>                                                                                                                                                                                                |
| <b>ste11, Un</b>     | <i>kanMX</i> | 5474 | 5264 | 5311 | 5349.667 | 6.24E-07  | yAS38  | <i>ste11Δ::kanMX</i><br><i>leu2Δ0 met15Δ0</i><br><i>ura3Δ0 his3Δ1</i>                                                                                                                                                                                                    |
| <b>ste11, In</b>     | <i>kanMX</i> | 5227 | 5196 | 5153 | 5192     | 5.19E-09  | yAS38  | <i>ste11Δ::kanMX</i><br><i>leu2Δ0 met15Δ0</i><br><i>ura3Δ0 his3Δ1</i>                                                                                                                                                                                                    |
| <b>ste12, Un</b>     | <i>kanMX</i> | 4085 | 3950 | 4058 | 4031     | 5.62E-07  | yAS340 | <i>ste12Δ::kanMX</i><br><i>leu2Δ0 lys2Δ0</i><br><i>ura3Δ0 his3Δ1</i><br><i>bar1::pFUS1-GFP-LEU2</i>                                                                                                                                                                      |
| <b>ste12, In</b>     | <i>kanMX</i> | 3733 | 3673 | 3697 | 3701     | 5.12E-09  | yAS340 | <i>ste12Δ::kanMX</i><br><i>leu2Δ0 lys2Δ0</i><br><i>ura3Δ0 his3Δ1</i><br><i>bar1::pFUS1-GFP-LEU2</i>                                                                                                                                                                      |
| <b>ste18, Un</b>     | <i>kanMX</i> | 5885 | 5936 | 5603 | 5808     | 6.57E-07  | yAS340 | Replicate 1:<br><i>ste18Δ::kanMX</i><br><i>leu2Δ0 ura3Δ0</i><br><i>his3Δ1 met15Δ0</i><br><i>bar1::pFUS1-GFP-LEU2</i><br><br>Replicates 2 and 3:<br><i>ste18Δ::kanMX</i><br><i>leu2Δ0 lys2Δ0</i><br><i>ura3Δ0 his3Δ1</i><br><i>met15Δ0</i><br><i>bar1::pFUS1-GFP-LEU2</i> |
| <b>ste18, In</b>     | <i>kanMX</i> | 5365 | 5479 | 5262 | 5368.667 | 5.199E-09 | yAS340 | Replicate 1:<br><i>ste18Δ::kanMX</i><br><i>leu2Δ0 ura3Δ0</i>                                                                                                                                                                                                             |

|                  |              |          |          |          |            |           |       |                                                                                                   |
|------------------|--------------|----------|----------|----------|------------|-----------|-------|---------------------------------------------------------------------------------------------------|
|                  |              |          |          |          |            |           |       | <i>his3Δ1 met15Δ0 bar1::pFUS1-GFP-LEU2</i>                                                        |
|                  |              |          |          |          |            |           |       | Replicates 2 and 3: <i>ste18Δ::kanMX leu2Δ0 lys2Δ0 ura3Δ0 his3Δ1 met15Δ0 bar1::pFUS1-GFP-LEU2</i> |
| <b>ste21, Un</b> | <i>kanMX</i> | 18732    | 20256    | 19327    | 19438.333  | 3.304E-06 | yAS38 | <i>ste21Δ::kanMX leu2Δ0 met15Δ0 ura3Δ0 his3Δ1</i>                                                 |
| <b>ste21, In</b> | <i>kanMX</i> | 204612   | 201627   | 235408   | 213882.333 | 1.663E-05 | yAS38 | <i>ste21Δ::kanMX leu2Δ0 met15Δ0 ura3Δ0 his3Δ1</i>                                                 |
| <b>ste22, Un</b> | <i>kanMX</i> | 47794    | 50171    | 51062    | 49675.667  | 0.005     | yAS38 | <i>ste22Δ::kanMX leu2Δ0 met15Δ0 ura3Δ0 his3Δ1</i>                                                 |
| <b>ste22, In</b> | <i>kanMX</i> | 4.79E+05 | 4.84E+05 | 4.95E+05 | 486000     | 0.172     | yAS38 | <i>ste22Δ::kanMX leu2Δ0 met15Δ0 ura3Δ0 his3Δ1</i>                                                 |
| <b>ste50, Un</b> | <i>kanMX</i> | 9754     | 10005    | 11321    | 10360      | 1.504E-06 | yAS38 | <i>ste50Δ::kanMX leu2Δ0 met15Δ0 ura3Δ0 his3Δ1</i>                                                 |
| <b>ste50, In</b> | <i>kanMX</i> | 37826    | 40050    | 41722    | 39866      | 9.874E-09 | yAS38 | <i>ste50Δ::kanMX leu2Δ0 met15Δ0 ura3Δ0 his3Δ1</i>                                                 |
