# Supplementary material for: Barcode Sequencing Screen Identifies SUB1 as a Regulator of Yeast Pheromone Inducible Genes
Source: PubMed Central journal article supplement (PMC4825658; doi:10.1534/g3.115.026757), 2016-02-01
Supplement: supp_g3.115.026757_TableS7.pdf [file supp_g3.115.026757_TableS7.pdf]

**Table S7: Strains used in this study.**

| Description                                                         | Strain        | Genotype                                                                         | Figure           |
|---------------------------------------------------------------------|---------------|----------------------------------------------------------------------------------|------------------|
| <b>Negative control strain</b>                                      | <b>BY4741</b> | <i>leu2Δ0 met15Δ0 ura3Δ0 his3Δ1</i>                                              |                  |
| <b>Reporter control strain</b>                                      | <b>yAS38</b>  | <i>leu2Δ0 met15Δ0 ura3Δ0 his3Δ1 bar1::pFus1-GFP-LEU2</i>                         |                  |
| <b>BY4743 transformed with pFUS1-GFP reporter construct</b>         | <b>yAS340</b> | <i>leu2Δ0 lys2Δ0/+ ura3Δ0 his3Δ1 met15Δ0/+ bar1::pFUS1-GFP-LEU2</i>              |                  |
| <b>SUB1-3HA tag for ChIP-Seq</b>                                    | <b>yAS420</b> | <i>SUB1-3HAtag::kanMX leu2Δ0 lys2Δ0 ura3Δ0 his3Δ1 met15 bar1::pFUS1-GFP-LEU2</i> |                  |
| <b>sub1Δ::kanMX for RNA-Seq</b>                                     | <b>yAS395</b> | <i>sub1Δ::kanMX lys2Δ0 ura3Δ0 his3Δ1 met15 bar1::pFUS1-GFP-LEU2</i>              |                  |
| <b>WT control for RNA-Seq</b>                                       | <b>yAS418</b> | <i>lys2Δ0 ura3Δ0 his3Δ1 met15 bar1::pFUS1-GFP-LEU2</i>                           |                  |
|                                                                     | <b>yAS473</b> | <i>hog1Δ::hygMX leu2Δ0 ura3Δ0 his3Δ1 bar1::pFus1-GFP-LEU2</i>                    | <b>Figure 4</b>  |
|                                                                     | <b>yAS474</b> | <i>sub1Δ::kanMX hog1Δ::hygMX leu2Δ0 ura3Δ0 his3Δ1 met15 bar1::pFus1-GFP-LEU2</i> | <b>Figure 4</b>  |
|                                                                     | <b>yAS476</b> | <i>sub1Δ::kanMX leu2Δ0 lys2Δ0 ura3Δ0 his3Δ1 bar1::pFus1-GFP-LEU2</i>             | <b>Figure 4</b>  |
| <b>whi3Δ strain from MATa YKO library</b>                           | <b>yAS146</b> | <i>whi3Δ::kanMX leu2Δ0 met15Δ0 ura3Δ0 his3Δ1 bar1::pFus1-GFP-LEU2</i>            | <b>Figure S6</b> |
| <b>whi3Δ strain from MATa YKO library transformed with reporter</b> | <b>yAS170</b> | <i>whi3Δ::kanMX leu2Δ0 met15Δ0 ura3Δ0 his3Δ1 bar1::pFus1-GFP-LEU2</i>            | <b>Figure S6</b> |
| <b>kch1Δ strain from MATa YKO library</b>                           | <b>yAS199</b> | <i>kch1Δ::kanMX leu2Δ0 met15Δ0 ura3Δ0 his3Δ1 bar1::pFus1-GFP-LEU2</i>            | <b>Figure S6</b> |
| <b>kch1Δ strain from MATa YKO library</b>                           | <b>yAS210</b> | <i>kch1Δ::kanMX leu2Δ0 met15Δ0 ura3Δ0 his3Δ1</i>                                 | <b>Figure S6</b> |

| transformed with reporter | <i>bar1::pFus1-GFP-LEU2</i>                                               |                  |
|---------------------------|---------------------------------------------------------------------------|------------------|
| <b>yAS408</b>             | <i>pbs2Δ::URA3 sub1Δ::kanMX leu2Δ0 lys2Δ0 ura3Δ0 his3Δ1</i>               | <b>Figure S5</b> |
| <b>yAS409</b>             | <i>sub1Δ::kanMX leu2Δ0 ura3Δ0 his3Δ1 met15Δ0</i>                          | <b>Figure S5</b> |
| <b>yAS410</b>             | <i>pbs2Δ::URA3 leu2Δ0 lys2Δ0 ura3Δ0 his3Δ1</i>                            | <b>Figure S5</b> |
| <b>yAS415</b>             | <i>leu2Δ0 lys2Δ0 ura3Δ0 his3Δ1</i>                                        | <b>Figure S5</b> |
| <b>yAS454</b>             | <i>pbs2Δ::URA3 SUB1-3HAtag::kanMX leu2Δ0 lys2Δ0 ura3Δ0 his3Δ1 met15Δ0</i> | <b>Figure S5</b> |
